# Supplementary material for: Techno-economic assessment of aluminum as a clean energy carrier to decarbonize remote industries
Source: Royal Society of Chemistry journal article supplement (doi:10.1039/d4ya00151f), 2024-01-01
Supplement: d4ya00151f1.pdf [file d4ya00151f1.pdf]

## Supplemental information

### S1 Aluminum smelters capital cost

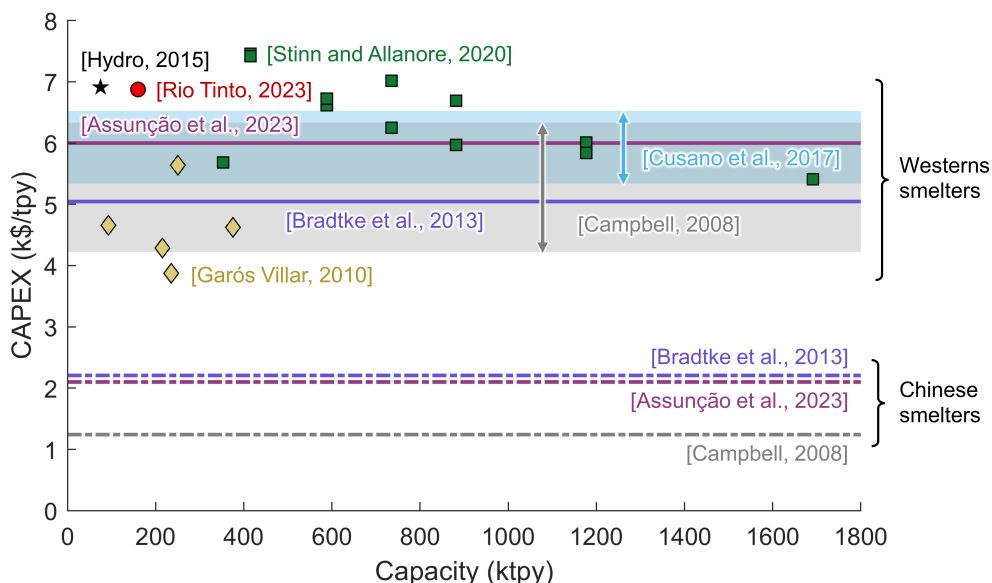

Fig. S1 Capital cost of aluminum smelters retrieved from literature.<sup>1-8</sup>. Data shown as shaded bands<sup>3,5</sup> to represent a range, or as lines<sup>5,6,8</sup> when plant capacity was not specified. Data was adjusted to 2020 USD using the Chemical Engineering Index, except for references from 2023<sup>7,8</sup>.

### S2 Inert anodes technology potential impact on aluminum production cost

Table S1 Summary of economic impact of inert anodes implementation in aluminum production based on a literature review.

| Category                    | Impact | Description/Note                                                                       | Year               |
|-----------------------------|--------|----------------------------------------------------------------------------------------|--------------------|
| Cell productivity           | +15%   | From Elysis public data                                                                | 2022 <sup>9</sup>  |
| Operating cost              | -15%   |                                                                                        |                    |
| Cell productivity           | +15%   | IA and WC                                                                              |                    |
| Operating cost              | -15%   | IA and WC                                                                              |                    |
| Energy consumption (kWh/kg) | 14.4   | Baseline carbon anode cell                                                             | 2007 <sup>10</sup> |
|                             | -3.0   | WC (ACD drops from 4.5 to 2.0 cm, reducing the bath drop from 1.75 to 0.78 V)          |                    |
|                             | +1.7   | IA and low overvoltage (from 0.55 to 0.1 V)                                            |                    |
|                             | -1.3   | IA, low overvoltage, and WC                                                            |                    |
| Anode cost - horizontal     | -71%   | From \$198/t <sub>Al</sub> for CA to \$57/t <sub>Al</sub> for horizontal IA            | 2006 <sup>11</sup> |
| Anode cost - slanted        | -76%   | From \$198/t <sub>Al</sub> for CA to \$47/t <sub>Al</sub> for horizontal IA            |                    |
| Anode cost - retrofit       | -10%   | From \$140/t <sub>Al</sub> for CA to \$128/t <sub>Al</sub> for retrofitted IA          |                    |
| Anode cost - new cell       | -40%   | From \$122/t <sub>Al</sub> for CA to \$73/t <sub>Al</sub> for vertical IA in new cells |                    |
| Anode plant CAPEX           | -90%   | Reduction from 160 M\$ to 10-15 M\$                                                    |                    |
| Labor requirement           | -34%   | Due to anode manufacturing and less anode handling                                     | 2001 <sup>12</sup> |
| Energy consumption (kWh/kg) | 13.2   | Baseline carbon anode cell                                                             |                    |
|                             | +2.5   | Retrofitted inert anode cell                                                           |                    |
|                             | +0.4   | IA, WC, vertical anodes, 90% CE                                                        |                    |
| Cathode lining cost         | +2%    | \$150,000 per cell increasing from WC                                                  |                    |

Legend: CA: carbon anode, IA: inert anode, WC: wettable cathode, ACD: anode to cathode distance, CE: current efficiency

### S3 Alumina market price

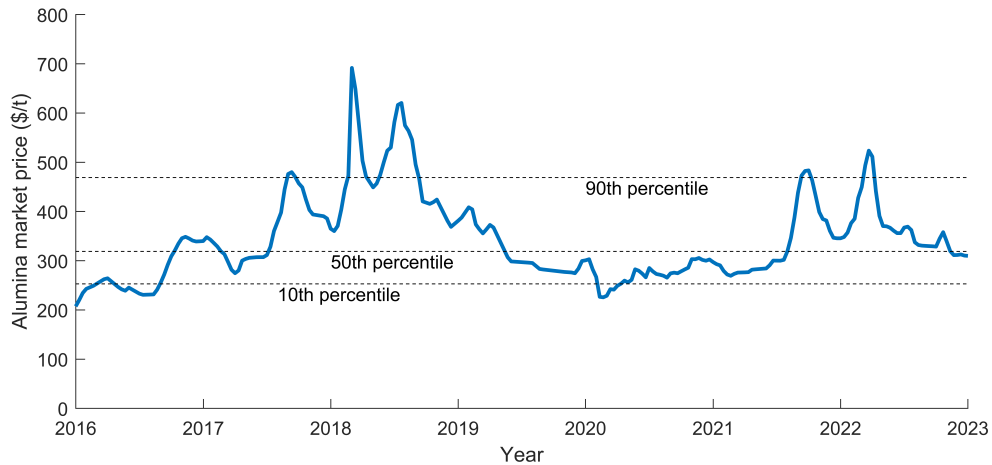

Fig. S2 Alumina market price (data retrieved from Norcks Hydro investors reports<sup>13-15</sup>).

### S4 Alternative energy carriers: liquefied hydrogen and ammonia

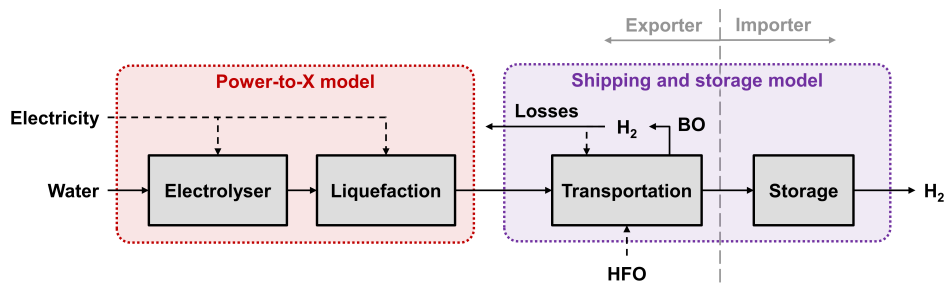

Fig. S3 Liquefied hydrogen Power-to-X, shipping and storage models block diagrams. Regasification was neglected as it represents a minimal CAPEX and energy requirement. No losses were assumed during the discharge of fuel from the carrier vessel to the tanks. The power plant is assumed to consume more than the boil-off losses, therefore avoiding the need for re-liquefaction on-site.

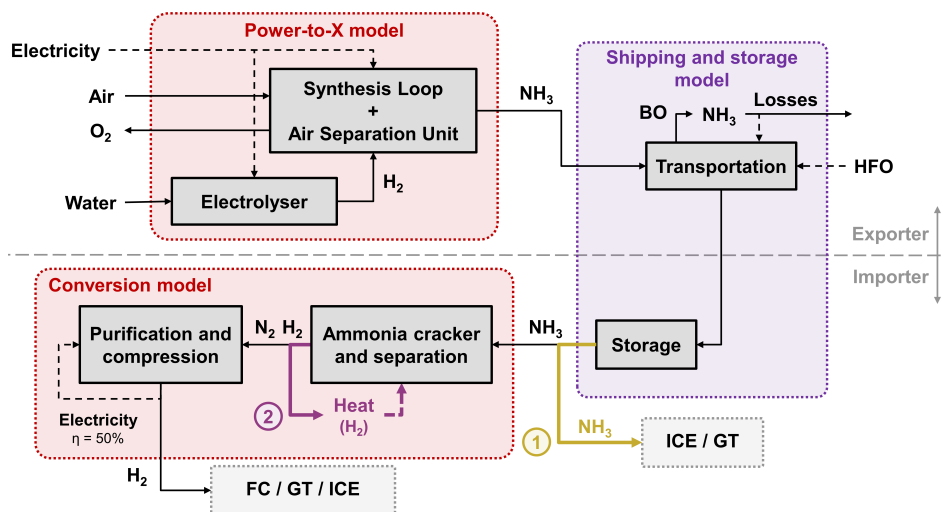

Fig. S4 Ammonia Power-to-X, shipping and storage models block diagrams. No losses were assumed during the discharge of fuel from the carrier vessel to the tanks. Compression and purification required after the cracking process were lumped together to simplify the analysis.

## S5 Hydrogen carriers shipping model

### Assumptions:

- The shipping cost  $C_{\text{ship}}$  is calculated per trip (round-trip).
- The vessel travels twice the shipping distance (specialized vessel returns empty).
- To account for boil-off losses, the delivered energy cost is calculated by summing the production (Power-to-X) cost and the shipping cost  $C_{\text{ship}}$ , and then dividing by the transportation efficiency defined as  $\eta_t = 1 - t_s \cdot \text{BOR}$ .

$$C_{\text{ship}} = \left( \frac{CPX_v(CRF + OPX_v)}{365} + L \right) (2t_s + t_h) + (F_{c,1} + F_{c,2} + C_{\text{canal}}) t_s + C_{\text{port}} \quad (\text{S1})$$

$$CPX_v = \rho \cdot V \cdot CPX_v \quad (\text{S2})$$

$$t_s = \frac{D}{24 \cdot S} \quad (\text{S3})$$

$$F_{c,1} = \left( \frac{P}{S \cdot \eta} - \frac{\text{BOR} \cdot V \cdot \rho \cdot E}{1,000} \right) HFO \geq 0 \quad (\text{S4})$$

$$F_{c,2} = \frac{P \cdot HFO}{S \cdot \eta} \quad (\text{S5})$$

**Table S2** Variables and parameters

| Variable           | Description                            | Units                | Value       | Notes                        |
|--------------------|----------------------------------------|----------------------|-------------|------------------------------|
| $CPX_v$            | Vessel CAPEX                           | \$                   | -           | see eqn (S2)                 |
| $CPX_v$            | Vessel unit CAPEX                      | \$/kg                | -           | see Table ??                 |
| $V$                | Vessel cargo capacity                  | m <sup>3</sup>       | 160,000     | -                            |
| $\rho$             | Energy carrier density                 | kg/m <sup>3</sup>    | -           | see Table ??                 |
| $OPX_v$            | Vessel operating cost                  | -                    | 4% of CAPEX | -                            |
| $L$                | Labor cost                             | \$/day               | 7,000       | same as Table ??             |
| $S$                | Vessel cruising speed                  | knots                | 14.5        | same as Table ??             |
| $D$                | Distance                               | km                   | -           | -                            |
| $t_s$              | Duration of the trip                   | days                 | -           | see eqn (S3)                 |
| $t_h$              | Number of handling days per round trip | days                 | 2           | -                            |
| $F_{c,1}$          | Fuel cost for the outward trip (full)  | \$/day               | -           | see eqn (S4)                 |
| $F_{c,2}$          | Fuel cost for the return trip (empty)  | \$/day               | -           | see eqn (S5)                 |
| $P$                | Vessel continuous power requirement    | MW                   | 10          | same as the dry bulk carrier |
| $\eta$             | Powertrain efficiency                  | -                    | 50%         | same as the dry bulk carrier |
| $\text{BOR}$       | Boil-off rate                          | %/day                | -           | see Table ??                 |
| $HFO$              | Heavy fuel oil energy cost             | \$/MWh <sub>ch</sub> | 42          | same as the dry bulk carrier |
| $E$                | Energy carrier specific energy         | kWh/kg               | -           | see Table ??                 |
| $C_{\text{canal}}$ | Canal costs                            | \$/day               | 10,000      | same as Table ??             |
| $C_{\text{port}}$  | Port charges                           | \$/trip              | 100,000     | same as Table ??             |

## S6 Stationary continuous power generation equipment cost and efficiency models

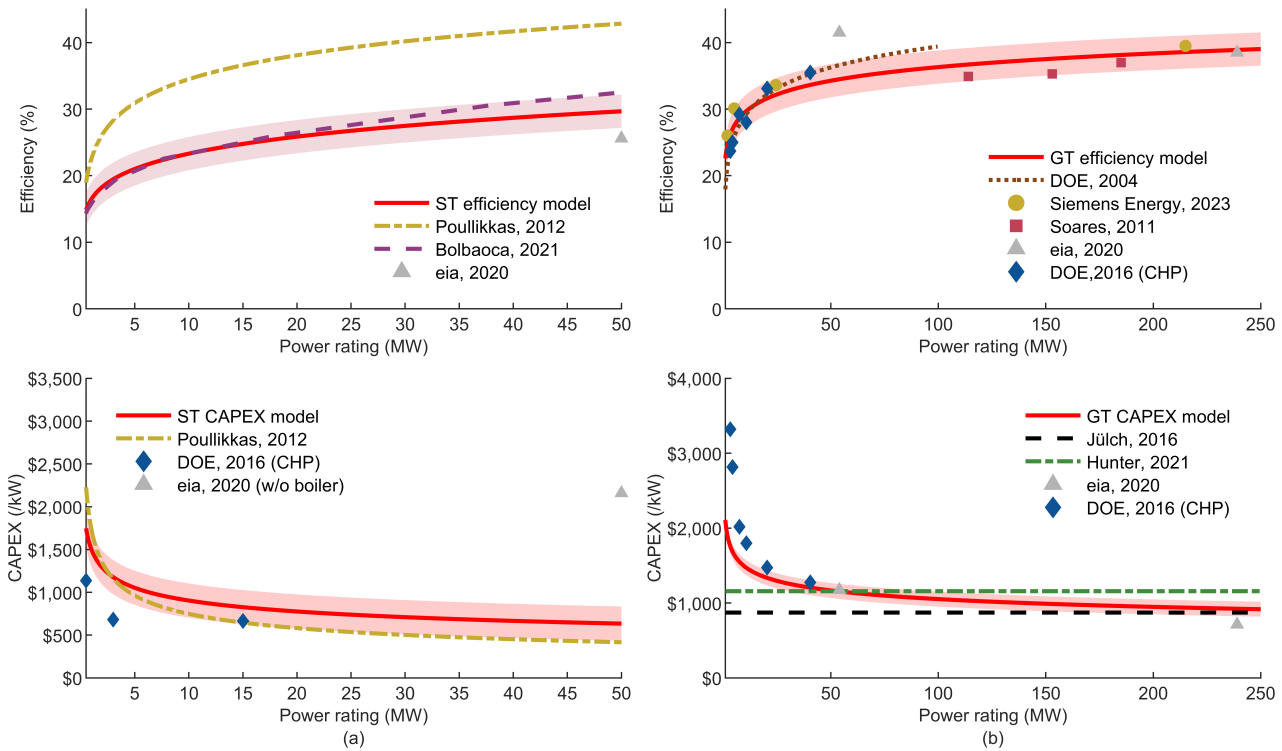

Fig. S5 Cost and efficiency models for (a) steam turbines<sup>16–18</sup>, and (b) gas turbines<sup>19–25</sup>.

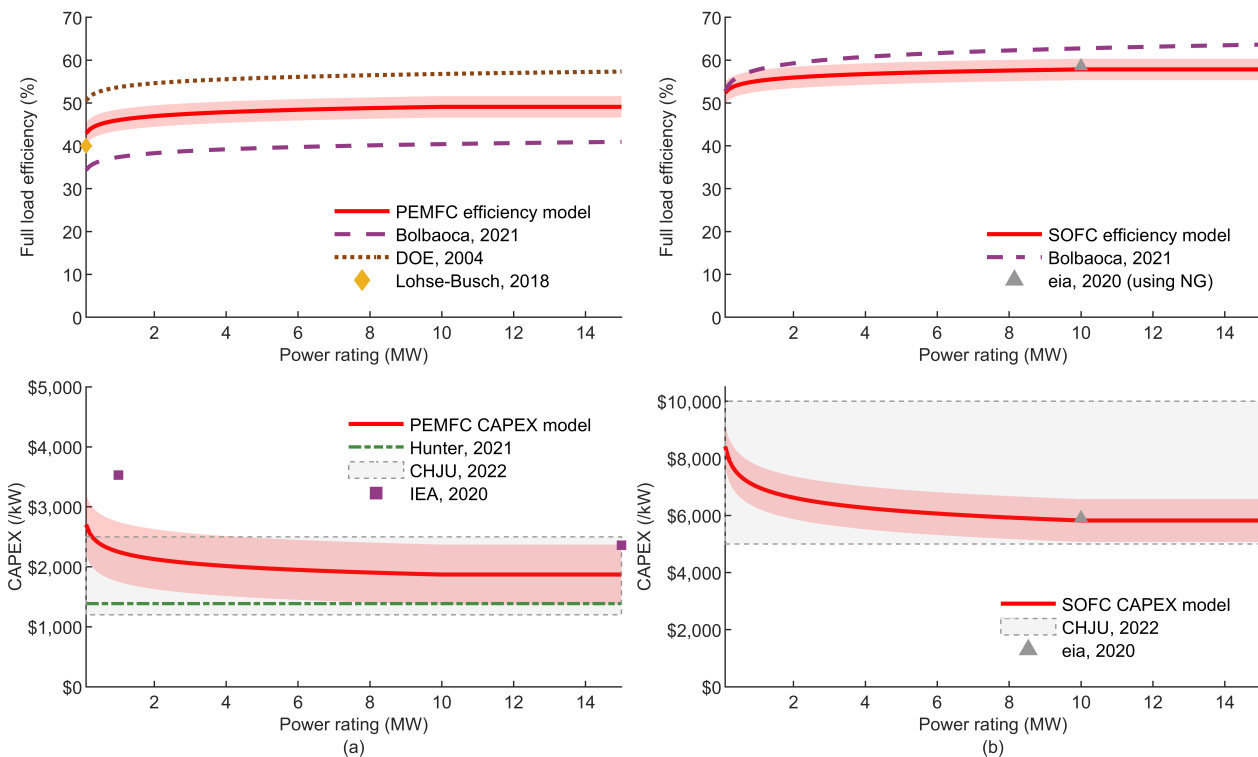

Fig. S6 Cost and efficiency models for (a) proton exchange membrane fuel cells<sup>17,19,25–28</sup>, and (b) solid oxide fuel cells<sup>17,27,29</sup>.

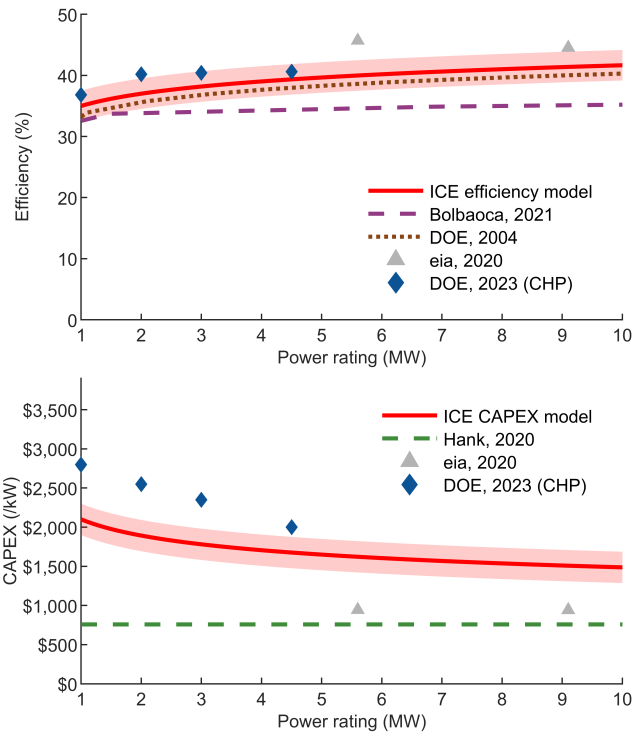

Fig. S7 Cost and efficiency models for internal combustion piston engines<sup>17,19,22,30,31</sup>.

Table S3 Power generation equipment assumptions at 25 MW<sub>e</sub>

| Parameter                                                                   | Value | Uncertainty |
|-----------------------------------------------------------------------------|-------|-------------|
| <i>General assumptions</i>                                                  |       |             |
| OPEX (% of CAPEX)                                                           | 2     | -           |
| Equipment life (years)                                                      | 10    | -           |
| Interest rate (%)                                                           | 8     | -           |
| <i>Steam turbine</i>                                                        |       |             |
| CAPEX (\$/kW <sub>e</sub> )                                                 | 739   | ± 200       |
| Efficiency (%)                                                              | 26.7  | ± 2.5       |
| <i>Gas turbine</i>                                                          |       |             |
| CAPEX (\$/kW <sub>e</sub> )                                                 | 1,296 | ± 100       |
| Efficiency (%)                                                              | 32.2  | ± 2.5       |
| <i>Internal combustion engine (modular 10 MW<sub>e</sub> units)</i>         |       |             |
| CAPEX (\$/kW <sub>e</sub> )                                                 | 1,487 | ± 200       |
| Efficiency (%)                                                              | 41.7  | ± 2.5       |
| <i>Proton exchange membrane fuel cell (modular 10 MW<sub>e</sub> units)</i> |       |             |
| CAPEX (\$/kW <sub>e</sub> )                                                 | 1,870 | ± 500       |
| Peak efficiency (%)                                                         | 61.3  | -           |
| Efficiency at full load (% of peak)                                         | 80    | -           |
| Full load efficiency (%)                                                    | 49.1  | ± 2.5       |
| <i>Solid oxide fuel cell (modular 10 MW<sub>e</sub> units)</i>              |       |             |
| CAPEX (\$/kW <sub>e</sub> )                                                 | 5,820 | ± 750       |
| Peak efficiency (%)                                                         | 66.1  | -           |
| Efficiency at full load (% of peak)                                         | 87.5  | -           |
| Full load efficiency (%)                                                    | 57.8  | ± 2.5       |

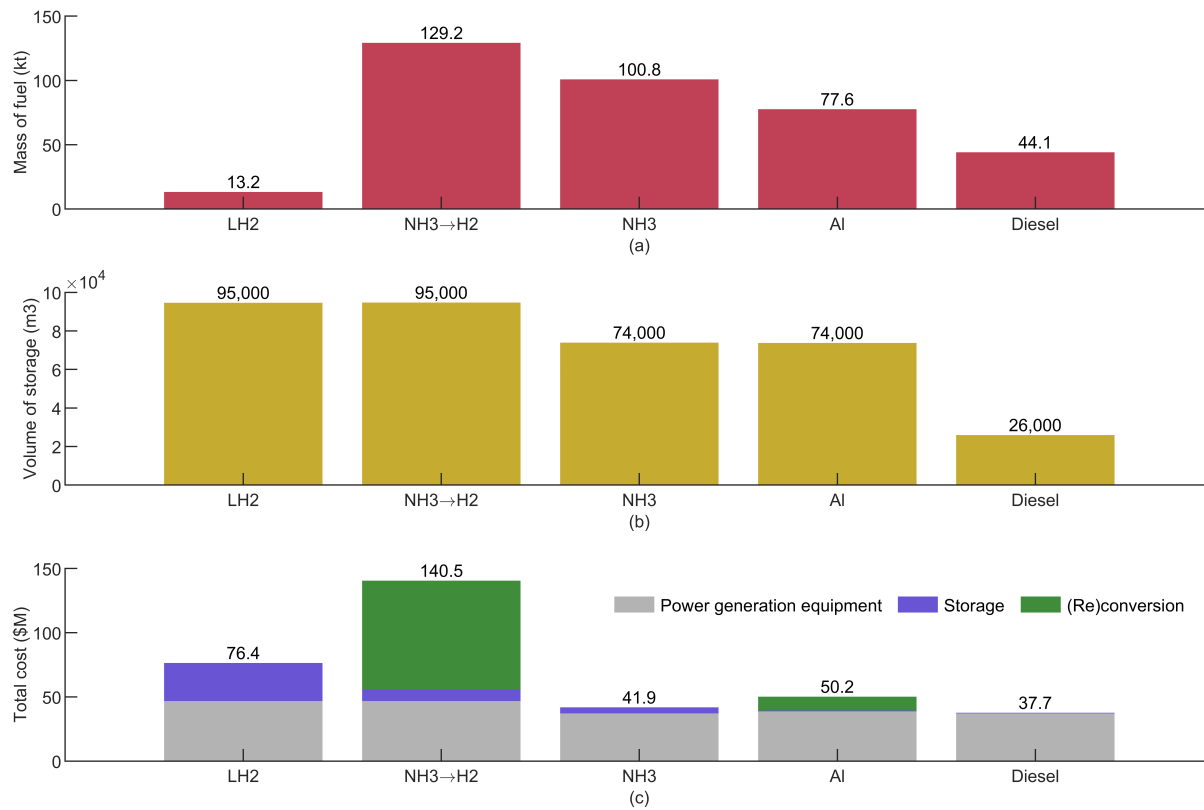

**Fig. S8** The (a) total mass of fuel to be shipped to the mine each year, the (b) volume of storage needed at the mine assuming 2 trips per year, and the (c) total CAPEX needed at the mine for a 25 MW<sub>e</sub> power generation system for each pathway. The mass and volume are a function of the efficiency of the power generation system and of the specific energy and energy density of each fuel. Aluminum storage also serves to store the alumina reaction products, increasing the overall volume needed.

## References

- 1 C. Stinn and A. Allanore, *Electrochemical Society Interface*, 2020, **29**, 44–49.
- 2 Hydro, *Hydro has decided to invest in technology pilot in Karmøy*, 2015, <https://www.hydro.com/en/medias/news/2015/hydro-has-decided-to-invest-in-technology-pilot-in-karmoy/>.
- 3 G. Cusano, L. Delgado Sancho, S. Roudier, F. Farrell and M. Rodrigo Gonzalo, *Best available techniques (BAT) reference document for the non-ferrous metals industries : Industrial Emissions Directive 2010/75/EU (integrated pollution prevention and control)*, 2017, <https://data.europa.eu/doi/10.2760/8224>.
- 4 I. T. Garós Villar, *M.Sc. thesis*, Massachusetts Institute of Technology, 2010.
- 5 J. Campbell, *China Aluminum Output Growth To Continue - Macquarie*, 2008, <https://www.proquest.com/wire-feeds/china-aluminum-output-growth-continue-macquarie/docview/2245067337/se-2?accountid=8612>.
- 6 T. Bradtke, F. Deforche, R. Deniskin, M. Gilbert, K. Gjerstad, K. Gruner, D. Harlacher, A. Koch and K. O. Rod, *The Aluminum Industry CEO Agenda 2013–2015: Understanding the Challenges and Taking Action*, 2013.
- 7 Rio Tinto, *Rio Tinto to expand its AP60 low-carbon aluminium smelter in Quebec*, 2023, <https://www.riotinto.com/en/news/releases/2023/rio-tinto-to-expand-its-ap60-low-carbon-aluminium-smelter-in-quebec>.
- 8 P. Assunção, J. Lorch, K. Olson, R. Penso, M. Stürtz and A. Ulanov, *Aluminum decarbonization at a cost that makes sense*, 2023, <https://www.mckinsey.com/industries/metals-and-mining/our-insights/aluminum-decarbonization-at-a-cost-that-makes-sense#/>.
- 9 A. Svendsen, *Light Metal Age*, 2022, **2**.
- 10 *Aluminum recycling and processing for energy conservation and sustainability*, ed. J. A. S. Green, ASM International, Materials Park, Ohio, 2007.
- 11 R. von Kaenel, *Light Metals*, 2006, 397–402.
- 12 J. Keniry, *JOM*, 2001, **53**, 43–47.
- 13 Norks Hydro, *Second quarter 2020 Investor presentation*, 2020, <https://www.hydro.com/Document/Doc/Investor%20presentation%20Q2%202020.pdf?docId=560591>.
- 14 Norks Hydro, *Annual Report 2021*, 2022, <https://www.hydro.com/globalassets/06-investors/reports-and-presentations/annual-report/rdmar21/annual-report-2021-eng.pdf>.
- 15 Norks Hydro, *Annual Report 2022*, 2023, <https://www.hydro.com/globalassets/06-investors/reports-and-presentations/annual-report/jenincharge22/annual-report-2022eng2.pdf>.
- 16 A. Poullikkas, C. Rouvas, I. Hadjipaschalis and G. Kourtis, *International Journal of Energy and Environment*, 2012, **3**, year.
- 17 A. M. Bolboaca, in *Hydrogen Fuel Cell Technology for Stationary Applications*, IGI Global, 2021, pp. 239–275.
- 18 DOE, *CHP Technologies: Steam Turbines*, U.S. Department of Energy Technical Report DOE/EE-1334, 2016.
- 19 DOE, *Fuel Cell Handbook*, 2004, <https://www.netl.doe.gov/sites/default/files/netl-file/FCHandbook7.pdf>.
- 20 Siemens Energy, *Siemens Energy gas turbine portfolio*, 2023, [https://p3.aprimocdn.net/siemensenergy/f31eafe1-17e9-4ffd-961b-b0b300c968a1/GT-Portfolio-Brochure-2023-update\\_20231031\\_144ppi-pdf\\_Original%20file.pdf](https://p3.aprimocdn.net/siemensenergy/f31eafe1-17e9-4ffd-961b-b0b300c968a1/GT-Portfolio-Brochure-2023-update_20231031_144ppi-pdf_Original%20file.pdf).
- 21 C. Soares, *Gas turbines: a handbook of air, land and sea applications*, Elsevier, 2011.
- 22 U.S. Energy Information Administration, *Capital Costs and Performance Characteristics for Utility Scale Power Generating Technologies*, U.S. Department of Energy technical report, 2020.
- 23 DOE, *CHP Technologies: Gas Turbines*, U.S. Department of Energy Technical Report DOE/EE-1330, 2016.
- 24 V. Jülch, *Applied Energy*, 2016, **183**, 1594–1606.
- 25 C. A. Hunter, M. M. Penev, E. P. Reznicek, J. Eichman, N. Rustagi and S. F. Baldwin, *Joule*, 2021, **5**, 2077–2101.
- 26 H. Lohse-Busch, K. Stutenberg, M. Duoba and S. Iliev, *Technology assessment of a fuel cell vehicle: 2017 Toyota Mirai*, Argonne National Lab. (ANL) Technical Report 1463251, 2018.
- 27 Clean Hydrogen Joint Undertaking, *Strategic Research and Innovation Agenda 2021–2027*, CleanHydrogen-GB-2022-02, 2022.
- 28 IEA, *Projected Costs of Generating Electricity 2020*, 2020, <https://www.iea.org/reports/projected-costs-of-generating-electricity-2020>.
- 29 US DOE Hydrogen and Fuel Cell Technologies Office, *DOE Technical Targets for Hydrogen Delivery*, <https://www.energy.gov/eere/fuelcells/doe-technical-targets-hydrogen-delivery>.
- 30 DOE, *CHP Technologies: Reciprocating Engines*, U.S. Department of Energy Technical Report DOE/EE-2764, 2023.
- 31 C. Hank, A. Sternberg, N. Köppel, M. Holst, T. Smolinka, A. Schaadt, C. Hebling and H.-M. Henning, *Sustainable Energy & Fuels*, 2020, **4**, 2256–2273.
